# Supplementary material
Source: PubMed Central journal article supplement (PMC5840864)
Supplement: NIHMS946146-supplement-supporting_information.pdf [file NIHMS946146-supplement-supporting_information.pdf]

**Supporting Information For:**

**Vanadyl as a Stable Structural Mimic of Reactive Ferryl Intermediates in Mononuclear Non-heme-iron Enzymes**

Ryan J. Martinie<sup>a</sup>, Christopher J. Pollock<sup>a</sup>, Megan L. Matthews<sup>c</sup>, J. Martin Bollinger, Jr.<sup>a,b\*</sup>  
Carsten Krebs<sup>a,b\*</sup>, and Alexey Silakov<sup>a\*</sup>

<sup>a</sup>Department of Chemistry and <sup>b</sup>Department of Biochemistry and Molecular Biology, The Pennsylvania State University, University Park, Pennsylvania 16802, United States

<sup>c</sup>Department of Chemical Physiology and The Skaggs Institute for Chemical Biology, The Scripps Research Institute, 10550 North Torrey Pines Road, La Jolla, California 92037, United States

## Supplementary Figures

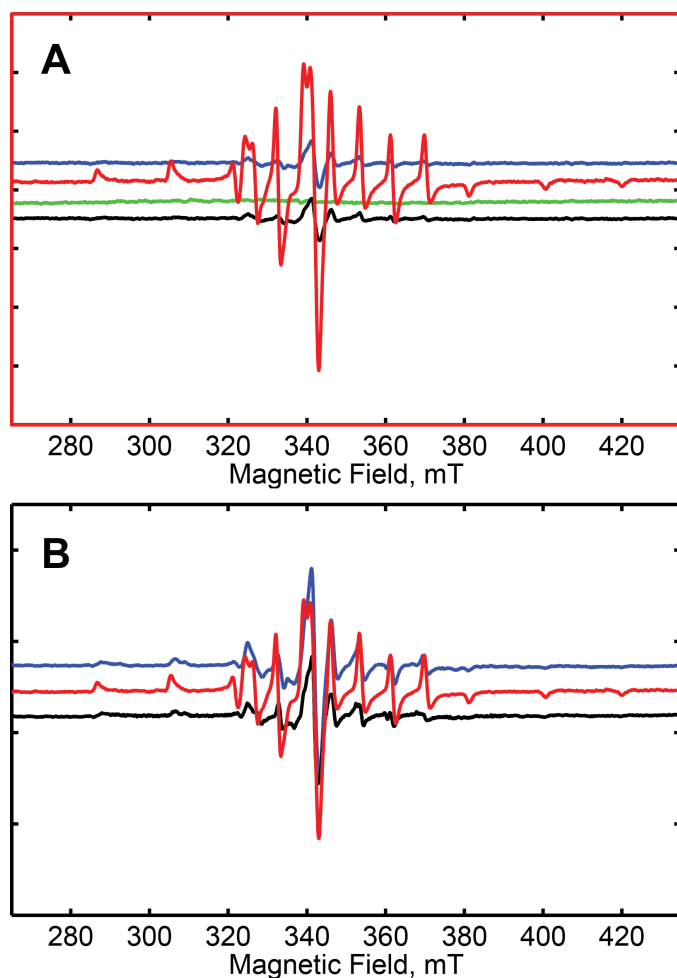

Figure S1. Comparison of continuous-wave (CW) EPR signals for solutions containing vanadyl. **(A)** Comparison of taurine only (green); succinate and taurine (blue); 2OG and taurine (black); or TauD, succinate, and taurine (red). Spectra are shifted vertically for clarity. **(B)** Comparison of TauD•vanadyl in the presence of succinate only (blue), 2OG only (black), or succinate and taurine (red). Concentration of species (if present): vanadyl sulfate (1.0 mM), succinate (3.0 mM), 2-oxo-glutarate (3.0 mM), TauD (1.6 mM) in 50 mM sodium HEPES pH 7.6. Spectra were recorded at 80 K with microwave frequency 9.625 GHz, microwave power 200  $\mu$ W, 10 G modulation amplitude, and 40 ms time constant and conversion time.

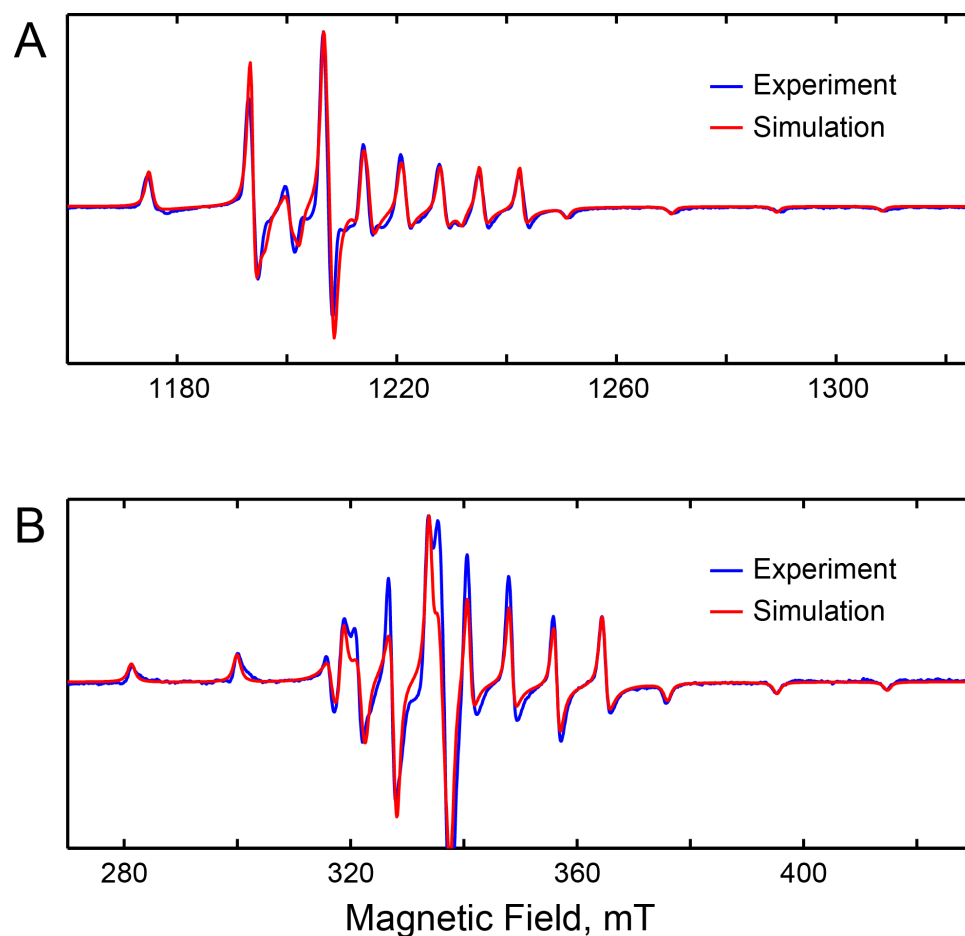

Figure S2. Experimental (blue) and simulated (red) electron paramagnetic resonance spectra of the TauD•(V<sup>IV</sup>O)•taurine•succinate complex, collected at Q-band (**A**) and X-band (**B**). The Q-band spectrum was collected as a two-pulse Hahn echo experiment with  $\tau = 200$  ns and 250  $\mu$ s shot repetition time at 40 K, with the pseudo-modulated spectrum shown. X-band spectrum was acquired using continuous-wave excitation at 80 K. X- and Q-band spectra were acquired at 9.478 & 33.788 GHz, respectively. Sample composition: TauD (1.5 mM), vanadyl sulfate (1.0 mM), succinate (5.0 mM), and taurine (5.0 mM). Simulation parameters:  $g = [1.944, 1.979, 1.981] \pm 0.001$  and  $A_V = [519, 185, 192] \pm 3$  MHz.

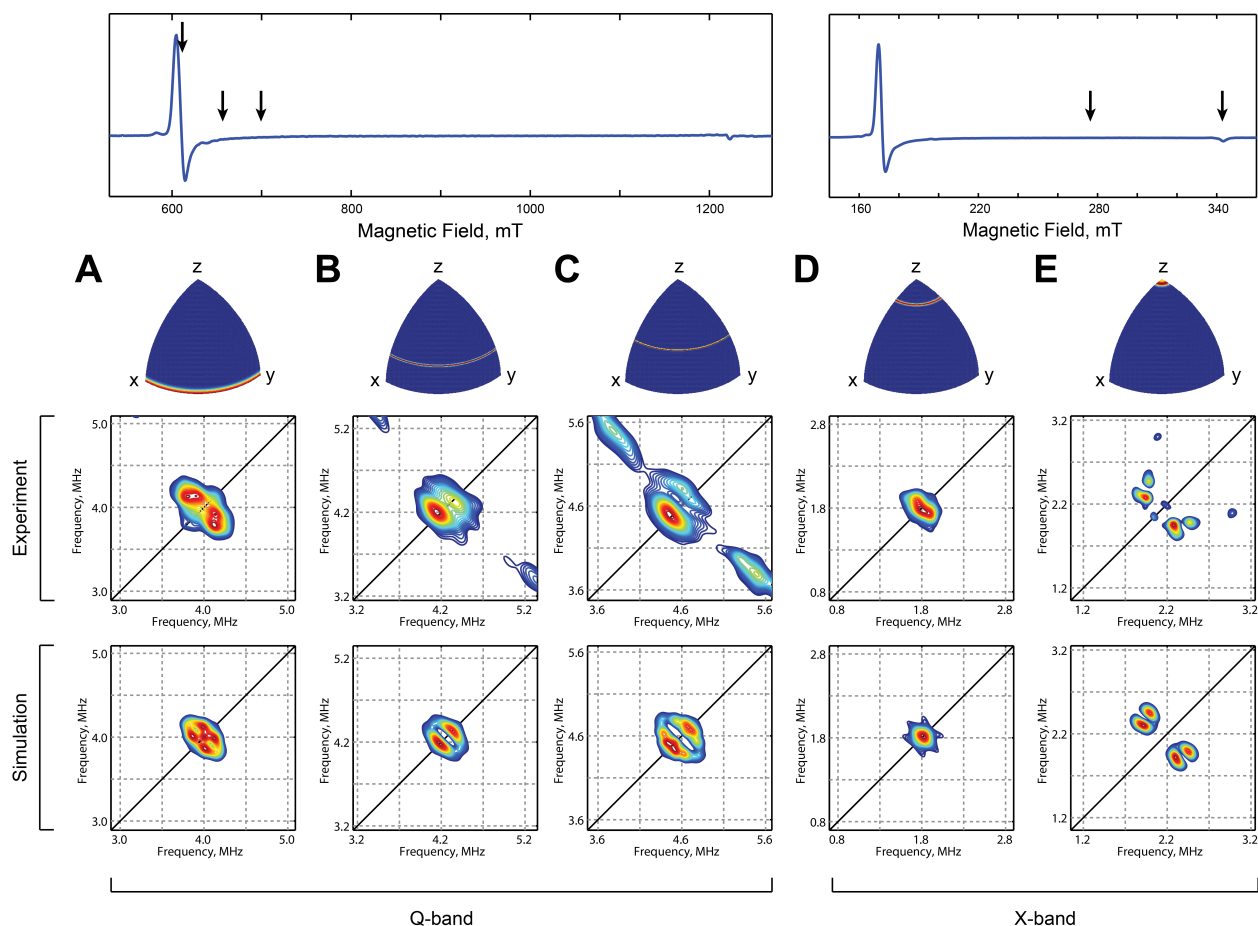

Figure S3. Field-dependent  $^2\text{H}$ -HYSCORE spectra of the  $\{\text{Fe-NO}\}^7$  form of TauD in the presence of  $d_4$ -taurine and 2OG collected at Q-band (**A-C**) and X-band (**D-E**). Orientation selectivities probed by each magnetic field position (shown above the spectra) are color coded using an RGB color scheme (red - fully excited; blue, not excited). Magnetic field positions of 610 (**A**), 650 (**B**), 700 (**C**), 275 (**D**), and 329 (**E**) mT are indicated by black arrows on the one-dimensional EPR spectra (top). Spectra were collected with microwave frequency 34.276 (Q-band) and 9.308 GHz (X-band), temperature 4.0 K,  $\pi/2$  pulse length of 8 ns, and  $\tau$  of 140, 140, 140, 220, and 200 ns, respectively. Simulation parameters: hyperfine coupling  $[0.26, 0.44, -0.70] \pm 0.05$  MHz with Euler angles of  $[0, 30, 93] \pm 10^\circ$  and deuterium nuclear quadrupole coupling  $[-0.04, -0.04, 0.08] \pm 0.03$  MHz with Euler angles  $[0, 40, 25] \pm 10^\circ$ . Sample preparation is described in the Materials and Methods.

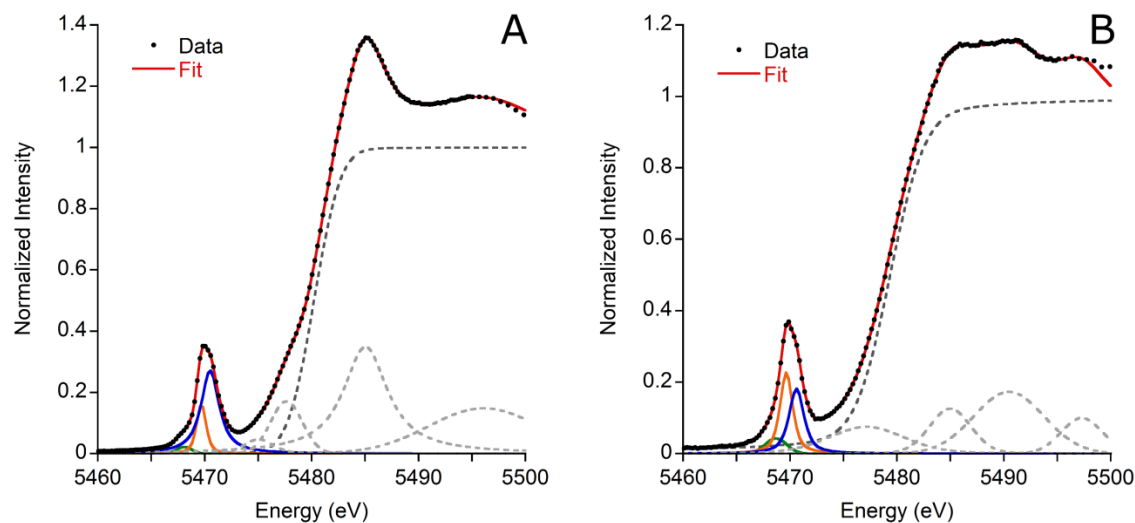

Figure S4. Representative fits of the XANES data (points) for  $\text{VO}(\text{H}_2\text{O})_5^{2+}$  (**A**) and the  $\text{TauD}\cdot(\text{V}^{\text{IV}}\text{O})\cdot\text{taurine}\cdot\text{succinate}$  complex (**B**). Solid lines represent components of the pre-edge, whereas gray, dashed lines are background components.

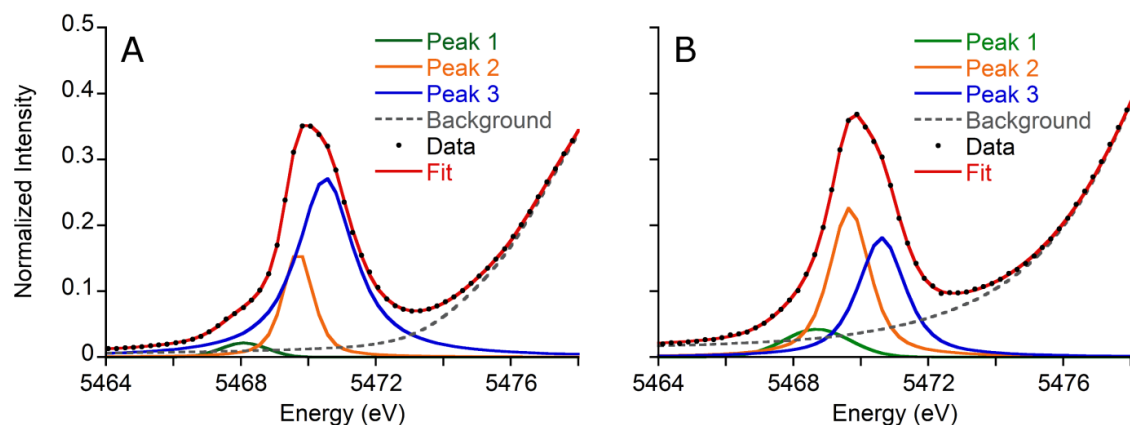

Figure S5. Representative fits of the pre-edge features in the XANES data for  $\text{VO}(\text{H}_2\text{O})_5^{2+}$  (**A**) and the  $\text{TauD}\cdot(\text{V}^{\text{IV}}\text{O})\cdot\text{taurine}\cdot\text{succinate}$  complex (**B**). Solid, colored lines represent components that were included in calculations of the pre-edge areas.

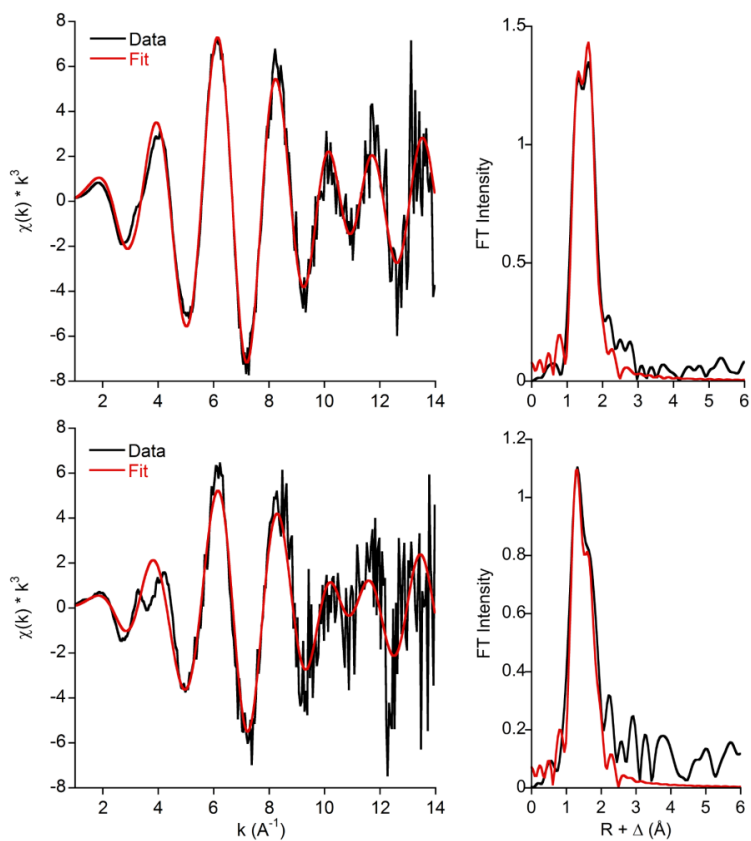

Figure S6. Fits to the  $k^3$ -weighted EXAFS data and Fourier transforms for  $\text{VO}(\text{H}_2\text{O})_5^{2+}$  (**top**) and the  $\text{TauD} \cdot (\text{V}^{\text{IV}}\text{O}) \cdot \text{taurine} \cdot \text{succinate}$  complex (**bottom**).

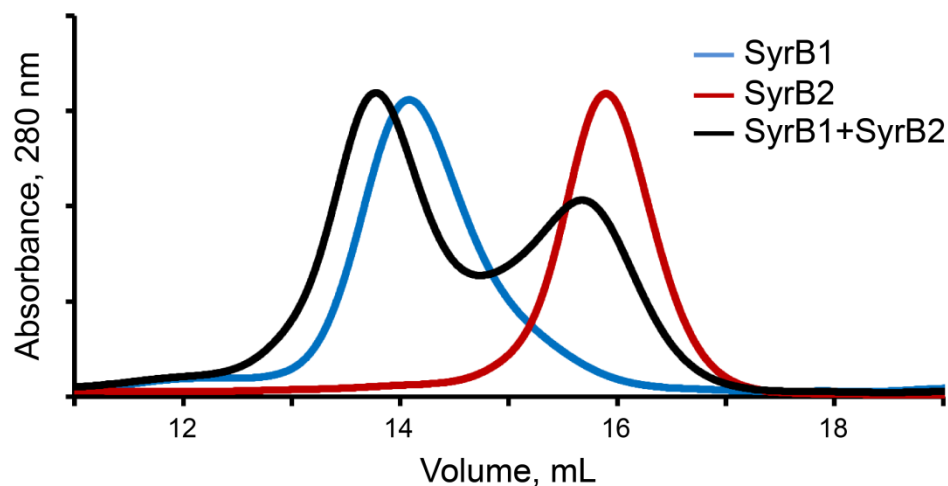

Figure S7. Elution chromatograms from size-exclusion chromatographic analysis of samples containing SyrB1 (**blue**), SyrB2 (**red**) or equi-molar quantities of both proteins (**black**). The shift of the mixed proteins relative to SyrB1 and SyrB2 alone is attributed to dynamic association during chromatography. SyrB2 (0.15 mM) and L-cyclopropylglycinyI-*S*-SyrB1 (0.15 mM) were applied to a GE Healthcare Superdex 200 10/300 GL column at 4 °C using a 100  $\mu$ L sample loop and eluted at 0.7 mL/min with 1.2 column volumes of 50 mM sodium HEPES pH 7.6, 150 mM NaCl.

## Supplementary Tables

**Table S1: EXAFS fit parameters for  $\text{VO}(\text{H}_2\text{O})_5^{2+}$  (top) and the  $\text{TauD}\cdot(\text{V}^{\text{IV}}\text{O})\cdot\text{taurine}\cdot\text{succinate}$  complex**

| $\text{VO}(\text{H}_2\text{O})_5^{2+}$ |   |          |                              | $\text{TauD-VO}$ |   |         |                              |
|----------------------------------------|---|----------|------------------------------|------------------|---|---------|------------------------------|
| Scatterer                              | N | R (Å)    | $\sigma^2$ (Å <sup>2</sup> ) | Scatterer        | N | R (Å)   | $\sigma^2$ (Å <sup>2</sup> ) |
| V-N/O                                  | 1 | 1.59     | 0.00157                      | V-N/O            | 1 | 1.60    | 0.00136                      |
| V-N/O                                  | 4 | 2.02     | 0.00284                      | V-N/O            | 3 | 2.05    | 0.00246                      |
| F                                      |   | 0.3314   |                              | F                |   | 0.5716  |                              |
| E <sub>0</sub>                         |   | -0.14 eV |                              | E <sub>0</sub>   |   | 4.04 eV |                              |

**Table S2: EXAFS fitting results for  $\text{VO}(\text{H}_2\text{O})_5^{2+}$**

| $\chi^2$ | F      | E <sub>0</sub> | V=O |      |            | V-N/O |      |            | V-N/O |      |            |
|----------|--------|----------------|-----|------|------------|-------|------|------------|-------|------|------------|
|          |        |                | N   | R    | $\sigma^2$ | N     | R    | $\sigma^2$ | N     | R    | $\sigma^2$ |
| 7.4718   | 0.8803 | 3.97134        | 1   | 1.55 | 0.0058     |       |      |            |       |      |            |
| 4.6009   | 0.6907 | 3.97131        | 2   | 1.58 | 0.00301    |       |      |            |       |      |            |
| 9.2426   | 0.979  | 2.81078        | 3   | 1.57 | 0.01124    |       |      |            |       |      |            |
| 5.1255   | 0.7291 | -1.6467        | 1   | 2.02 | -0.0027    |       |      |            |       |      |            |
| 3.6942   | 0.619  | -0.5603        | 2   | 2.03 | -0.0003    |       |      |            |       |      |            |
| 3.0418   | 0.5616 | -3.0165        | 3   | 2.02 | 0.00146    |       |      |            |       |      |            |
| 2.8068   | 0.5395 | -4.091         | 4   | 2.01 | 0.00292    |       |      |            |       |      |            |
| 2.8515   | 0.5438 | -5.8326        | 5   | 2.00 | 0.00424    |       |      |            |       |      |            |
| 1.6161   | 0.4079 | -3.6211        | 1   | 1.59 | 0.00205    | 6     | 2.01 | 0.00573    |       |      |            |
| 1.2644   | 0.3608 | -1.9091        | 1   | 1.59 | 0.00179    | 5     | 2.02 | 0.00429    |       |      |            |
| 1.0671   | 0.3314 | -0.141         | 1   | 1.59 | 0.00157    | 4     | 2.02 | 0.00284    |       |      |            |
| 1.13     | 0.3411 | 1.56566        | 1   | 1.60 | 0.00142    | 3     | 2.03 | 0.0013     |       |      |            |
| 1.0402   | 0.326  | 0.11454        | 1   | 1.59 | 0.00157    | 4     | 2.02 | 0.00283    | 1     | 2.45 | 0.02339    |
| 1.181    | 0.3474 | -1.518         | 1   | 1.59 | 0.00177    | 5     | 2.02 | 0.00426    | 1     | 2.38 | 0.01299    |

**Table S3: EXAFS fitting results for the TauD•(V<sup>IV</sup>O)•taurine•succinate complex**

| $\chi^2$ | F      | E <sub>0</sub> | V=O |      |            | V-N/O |      |            | V-N/O |      |            |
|----------|--------|----------------|-----|------|------------|-------|------|------------|-------|------|------------|
|          |        |                | N   | R    | $\sigma^2$ | N     | R    | $\sigma^2$ | N     | R    | $\sigma^2$ |
| 5.4733   | 0.8579 | 3.51693        | 1   | 1.59 | 0.00179    |       |      |            |       |      |            |
| 5.8301   | 0.8854 | 4.03515        | 2   | 1.60 | 0.00556    |       |      |            |       |      |            |
| 6.7101   | 0.9499 | -16.408        | 3   | 1.54 | 0.00882    |       |      |            |       |      |            |
| 5.6113   | 0.8686 | 4.03522        | 1   | 2.05 | 0.00109    |       |      |            |       |      |            |
| 4.635    | 0.7895 | 2.31054        | 2   | 2.05 | 0.00087    |       |      |            |       |      |            |
| 4.2853   | 0.7591 | 0.03089        | 3   | 2.04 | 0.00266    |       |      |            |       |      |            |
| 4.1533   | 0.7473 | -2.9326        | 4   | 2.02 | 0.00417    |       |      |            |       |      |            |
| 4.1585   | 0.7478 | -5.6757        | 5   | 2.01 | 0.00548    |       |      |            |       |      |            |
| 4.2502   | 0.7560 | -9.2176        | 6   | 1.99 | 0.00664    |       |      |            |       |      |            |
| 2.6946   | 0.5997 | 4.0352         | 1   | 1.60 | 0.00121    | 2     | 2.04 | 0.00064    |       |      |            |
| 2.4478   | 0.5716 | 4.03512        | 1   | 1.60 | 0.00136    | 3     | 2.05 | 0.00246    |       |      |            |
| 2.4883   | 0.5763 | 1.45792        | 1   | 1.60 | 0.00150    | 4     | 2.03 | 0.00415    |       |      |            |
| 2.6389   | 0.5935 | -0.3822        | 1   | 1.59 | 0.00170    | 5     | 2.03 | 0.00574    |       |      |            |
| 2.8534   | 0.6171 | -2.4176        | 1   | 1.59 | 0.00175    | 6     | 2.02 | 0.00734    |       |      |            |
| 2.8588   | 0.6177 | 4.03522        | 2   | 1.61 | 0.00629    | 3     | 2.04 | 0.0029     |       |      |            |
| 2.709    | 0.6013 | 4.03518        | 2   | 1.61 | 0.00610    | 4     | 2.03 | 0.00519    |       |      |            |
| 2.7346   | 0.6041 | 2.79102        | 2   | 1.61 | 0.00624    | 5     | 2.03 | 0.0069     |       |      |            |
| 2.4007   | 0.5639 | 3.55141        | 1   | 1.60 | 0.00137    | 3     | 2.04 | 0.00248    | 1     | 4.10 | -0.0016    |
| 2.4951   | 0.5633 | 4.03517        | 1   | 1.60 | 0.00152    | 3     | 2.05 | 0.00254    | 2     | 2.56 | 0.01735    |
| 2.2906   | 0.5509 | 4.03489        | 1   | 1.60 | 0.00139    | 3     | 2.04 | 0.00254    | 1     | 2.61 | -0.0009    |
| 2.4549   | 0.5703 | 4.03511        | 1   | 1.60 | 0.00150    | 3     | 2.04 | 0.00259    | 2     | 2.61 | 0.00371    |
| 2.4176   | 0.5659 | 4.03504        | 1   | 1.60 | 0.00156    | 3     | 2.05 | 0.00254    | 3     | 2.56 | 0.02223    |
| 2.3226   | 0.5547 | 2.24498        | 1   | 1.60 | 0.00144    | 4     | 2.04 | 0.0042     | 1     | 2.61 | -0.0007    |
| 2.3775   | 0.5612 | 3.21365        | 1   | 1.60 | 0.00151    | 4     | 2.04 | 0.00417    | 2     | 2.50 | 0.02194    |
| 2.4408   | 0.5686 | -4.875         | 1   | 1.58 | 0.00162    | 5     | 2.01 | 0.00627    | 1     | 2.34 | 0          |
